# Supplementary material
Source: HighWire-hosted journal article supplement (https://www.rcpjournals.org/highwire/filestream/13065/field_highwire_adjunct_files/0/Graham-Brown_Supplementary_material_S1.pdf)
Supplement: Graham-Brown_Supplementary_material_S1.pdf [file Graham-Brown_Supplementary_material_S1.pdf]

## Supplemental Files

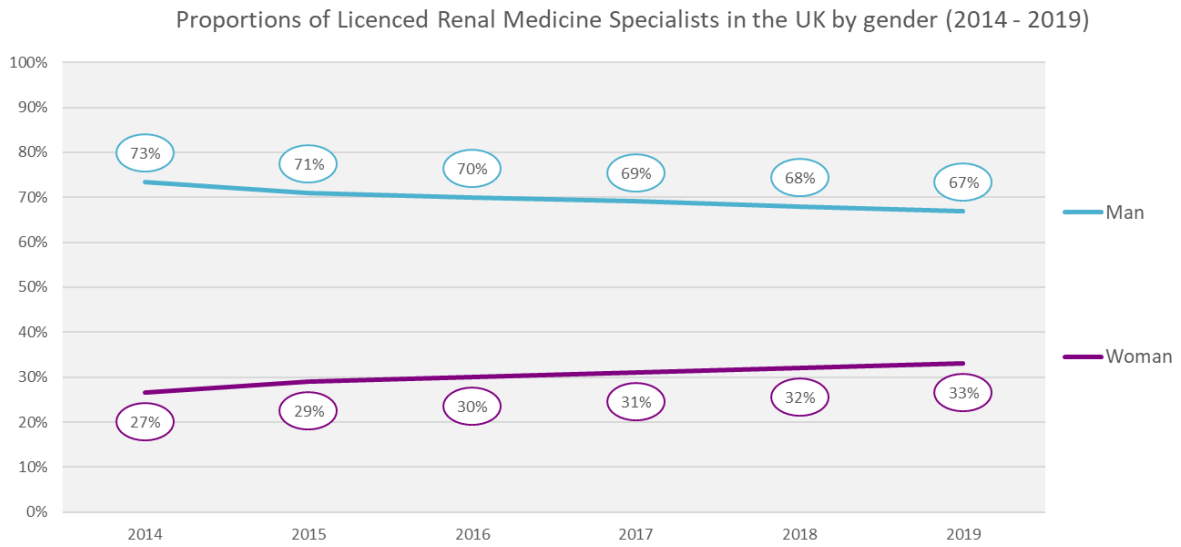

Supplemental Figure S1: Changes in the proportions of males and females on the GMC register for Renal Medicine between 2014 and 2019

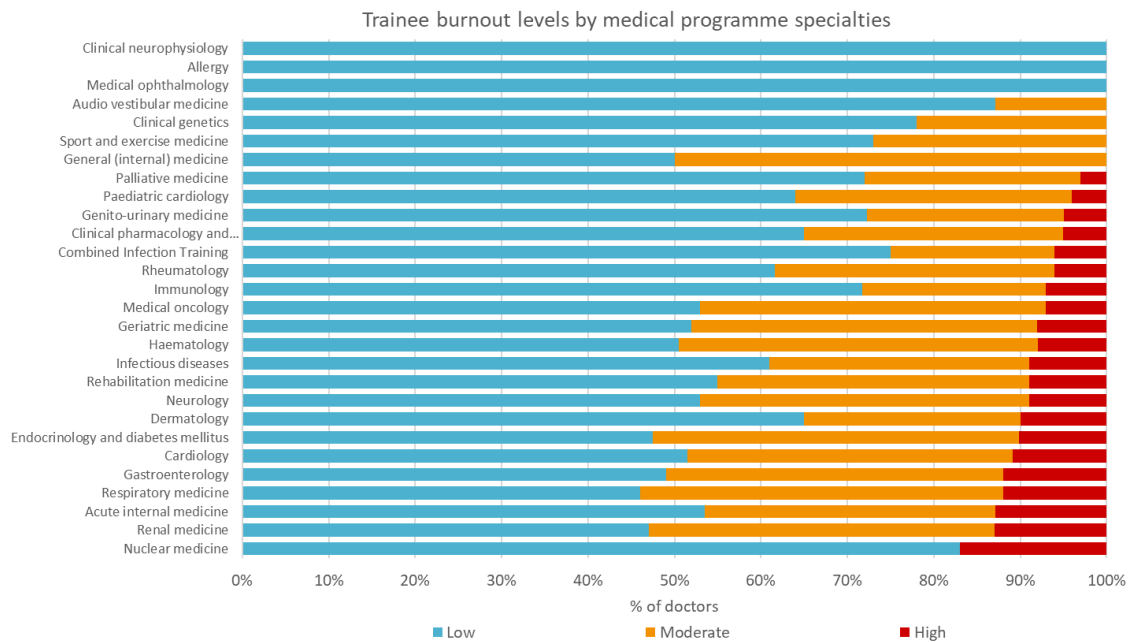

Supplemental Figure S2: Trainee burnout level by medical specialty programme from the GMC NTS survey 2019
